# Supplementary material
Source: publisher site journal article supplement (https://www.spandidos-publications.com/7771/downloadSupplementary)
Supplement: Supplementary file 1 [file downloadSupplementary]

## Newcastle-Ottawa Scale (NOS) Assessment

NOS assessment for the study by Schwarzman *et al* (5)

### Selection (Maximum 4 stars)

#### 1. Representativeness of the Exposed Cohort (1 star):

The cohort is representative of the general population as it includes a large, population-based cohort from a tertiary medical center covering a wide geographic area (Southern Israel).

**Star awarded**

#### 2. Selection of the Non-Exposed Cohort (1 star):

The non-exposed cohort consisted of women who had only vaginal deliveries, which is a valid and appropriate comparison group.

**Star awarded**

#### 3. Ascertainment of Exposure (1 star):

Data were collected from two linked computerized databases: perinatal and hospitalization databases. The exposure (CS) was clearly recorded as part of routine data collection.

**Star awarded**

#### 4. Demonstration that Outcome of Interest Was Not Present at Start (1 star):

Women with known malignancies prior to inclusion were excluded, ensuring that the outcome was not present at the start of the study.

**Star awarded**

### Comparability (Maximum 2 stars)

#### 1. Comparability of Cohorts on the Basis of the Design or Analysis (2 stars):

The study controlled for several confounders, including age, parity, diabetes mellitus, hypertension, obesity, and fertility treatments, through Cox proportional hazards models.

**2 stars awarded**

### Outcome (Maximum 3 stars)

#### 1. Assessment of Outcome (1 star):

The outcomes were ascertained using hospital databases with reliable coding and recording methods.

**Star awarded**

#### 2. Was Follow-Up Long Enough for Outcomes to Occur (1 star):

The maximum follow-up duration was 26 years, which is sufficient for assessing long-term cancer risks.

**Star awarded**

#### 3. Adequacy of Follow-Up of Cohorts (1 star):

Follow-up was adequate and complete, as the data were collected from a single tertiary medical center, minimizing the risk of loss to follow-up.

**Star awarded**

**Total NOS Score: 9/9 (High Quality)**

NOS assessment for the study by Oğuz *et al.* (7)

### Selection (Maximum 4 stars)

#### 1. Representativeness of the Exposed Cohort (1 star):

The cohort consisted of breast cancer patients treated at Ankara University Hospitals, representing a single-center hospital-based cohort, which may not fully represent the general population.

**Star not awarded**

#### 2. Selection of the Non-Exposed Cohort (1 star):

The non-exposed cohort consisted of breast cancer patients without a history of cesarean delivery, appropriately matched within the same hospital setting.

**Star awarded**

#### 3. Ascertainment of Exposure (1 star):

Exposure (history of cesarean delivery) was ascertained through patient medical records, which is a reliable source.

**Star awarded**

#### 4. Demonstration that Outcome of Interest Was Not Present at Start (1 star):

The study included only patients diagnosed with breast cancer after delivery, ensuring that the outcome was not present at the start of the study.

**Star awarded**

**Comparability (Maximum 2 stars)**

**1. Comparability of Cohorts on the Basis of the Design or Analysis (2 stars):**

The study controlled for relevant confounders, such as age, parity, menopausal status, and estrogen receptor (ER) status, by subgroup analysis and statistical modeling.

**2 stars awarded**

**Outcome (Maximum 3 stars)**

**1. Assessment of Outcome (1 star):**

The outcomes (tumor characteristics and prognosis) were assessed based on medical records and pathology reports, ensuring objective and accurate data.

**Star awarded**

**2. Was Follow-Up Long Enough for Outcomes to Occur (0 stars):**

The study did not include long-term follow-up for survival outcomes, which limits the assessment of prognosis over time.

**Star not awarded**

**3. Adequacy of Follow-Up of Cohorts (1 star):**

Follow-up was sufficient to assess the association between delivery mode and breast cancer characteristics, but it lacked long-term survival data.

**Star awarded**

**Total NOS Score: 7/9 (High Quality)**

NOS assessment for the study by Kalan *et al.* (9)

**Selection (Maximum 4 stars)**

**1. Representativeness of the Exposed Cohort (1 star):**

The cohort consists of breast cancer patients from a single tertiary oncology center (Hacettepe University Institute of Oncology), which may limit generalizability to broader populations.

**Star not awarded**

**2. Selection of the Non-Exposed Cohort (1 star):**

The non-exposed cohort consisted of breast cancer patients without a history of cesarean delivery, drawn from the same clinical setting, ensuring consistency.

**Star awarded**

**3. Ascertainment of Exposure (1 star):**

Exposure to cesarean delivery was obtained from medical records, which is a reliable source of information.

**Star awarded**

**4. Demonstration that Outcome of Interest Was Not Present at Start (1 star):**

The study included only breast cancer patients after the delivery event, ensuring that the cancer outcome was not present at the start of exposure.

**Star awarded**

**Comparability (Maximum 2 stars)**

**1. Comparability of Cohorts on the Basis of the Design or Analysis (1 star):**

The study controlled for some confounders such as estrogen receptor (ER) status and hormone therapy use through multivariate logistic regression analysis. However, not all potential confounders were addressed.

**1 star awarded**

**Outcome (Maximum 3 stars)**

**1. Assessment of Outcome (1 star):**

Outcomes related to tumor characteristics and prognosis were assessed based on pathology reports and medical records.

**Star awarded**

**2. Was Follow-Up Long Enough for Outcomes to Occur (0 stars):**

The study did not provide long-term follow-up data to assess survival outcomes.

**Star not awarded**

**3. Adequacy of Follow-Up of Cohorts (1 star):**

Although long-term follow-up was not conducted, data on tumor characteristics and progression were adequately reported within the study timeframe.

**Star awarded**

**Total NOS Score: 7/9 (High Quality)**

NOS assessment for the study by Kang *et al.* (8)

## **Selection (Maximum 4 stars)**

### **1. Representativeness of the Exposed Cohort (1 star):**

The cohort is representative of the general population as it used nationwide health insurance data covering 97% of the population in Korea.

**Star awarded**

### **2. Selection of the Non-Exposed Cohort (1 star):**

The non-exposed cohort consisted of women without postpartum breast cancer, selected from the same nationwide database, ensuring comparability.

**Star awarded**

### **3. Ascertainment of Exposure (1 star):**

Exposure to cesarean delivery and postpartum breast cancer was ascertained using reliable ICD-10 diagnostic codes from the national database.

**Star awarded**

### **4. Demonstration that Outcome of Interest Was Not Present at Start (1 star):**

Women diagnosed with breast cancer before childbirth were excluded, ensuring that the outcome of interest (breast cancer) was not present at the start.

**Star awarded**

## **Comparability (Maximum 2 stars)**

### **1. Comparability of Cohorts on the Basis of the Design or Analysis (2 stars):**

The study adjusted for key confounding variables such as maternal age, parity, and other pregnancy-related factors using multivariate logistic regression models.

**2 stars awarded**

### **Outcome (Maximum 3 stars)**

#### **1. Assessment of Outcome (1 star):**

Outcomes were identified through national health insurance claims data, providing reliable and comprehensive coverage.

**Star awarded**

#### **2. Was Follow-Up Long Enough for Outcomes to Occur (1 star):**

The maximum follow-up period was 4 years, which is adequate to capture the development of postpartum breast cancer.

**Star awarded**

#### **3. Adequacy of Follow-Up of Cohorts (1 star):**

The follow-up was complete and adequate due to the comprehensive nature of the national insurance database.

**Star awarded**

**Total NOS Score: 9/9 (High Quality)**
